# Supplementary material for: Neural-network-backed evolutionary search for SrTiO3(110) surface reconstructions
Source: Royal Society of Chemistry journal article supplement (doi:10.1039/d2dd00072e), 2022-01-01
Supplement: d2dd00072e1.pdf [file d2dd00072e1.pdf]

Supplementary Information  
Neural-Network-backed evolutionary search  
for SrTiO<sub>3</sub>(110) surface reconstructions

Ralf Wanzenböck,<sup>a</sup> Marco Arrigoni,<sup>a</sup> Sebastian Bichelmaier,<sup>a</sup> Florian Buchner,<sup>a</sup> Jesús Carrete,<sup>a</sup> and Georg K. H. Madsen<sup>\*a</sup>

Supplementary figures

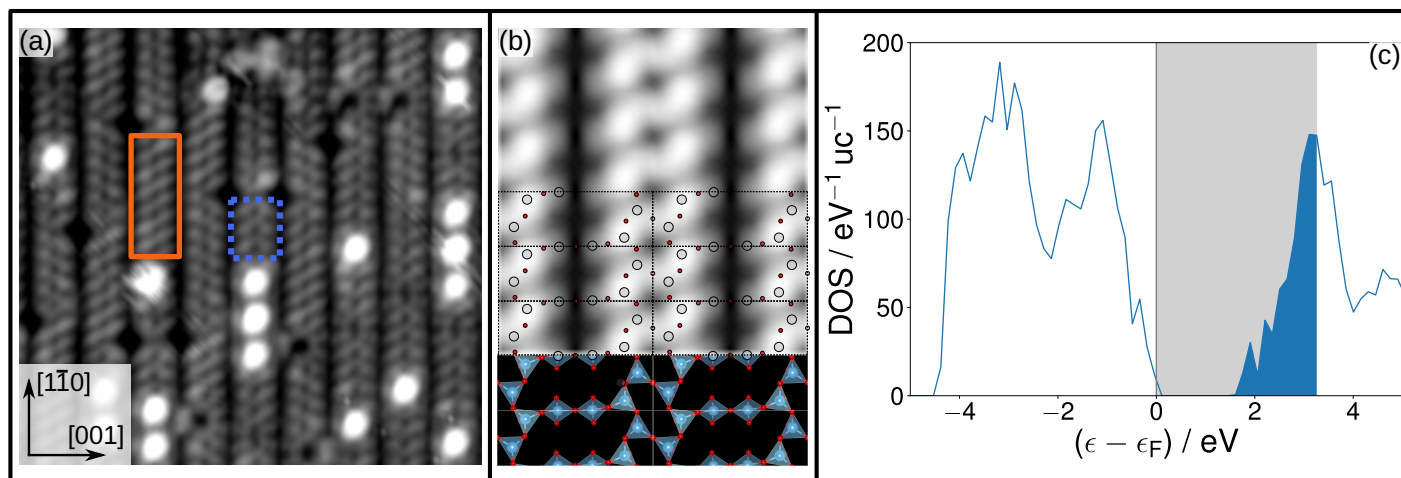

Fig. 1 Comparison of recorded and simulated STM images of the SrTiO<sub>3</sub>(110) 4×1 surface. (a) Section of an experimental result courtesy of Zhiming Wang, published in full and annotated in reference<sup>1</sup>, shown with added highlights indicating regions with p2 symmetry (solid orange) and pm symmetry (dotted blue). (b) Simulated STM image (Tersoff-Hamann approximation<sup>2</sup> integrating the local density of states up to 3.3 eV above the Fermi level ε<sub>F</sub>) of structure 4×1(d) in Fig. 5 of the manuscript, also exhibiting p2 symmetry. (c) Electronic density of states calculated using VASP<sup>3</sup> for the same structure.

<sup>a</sup> Institute of Materials Chemistry, TU Wien, 1060 Vienna, Austria. E-mail: georg.madsen@tuwien.ac.at

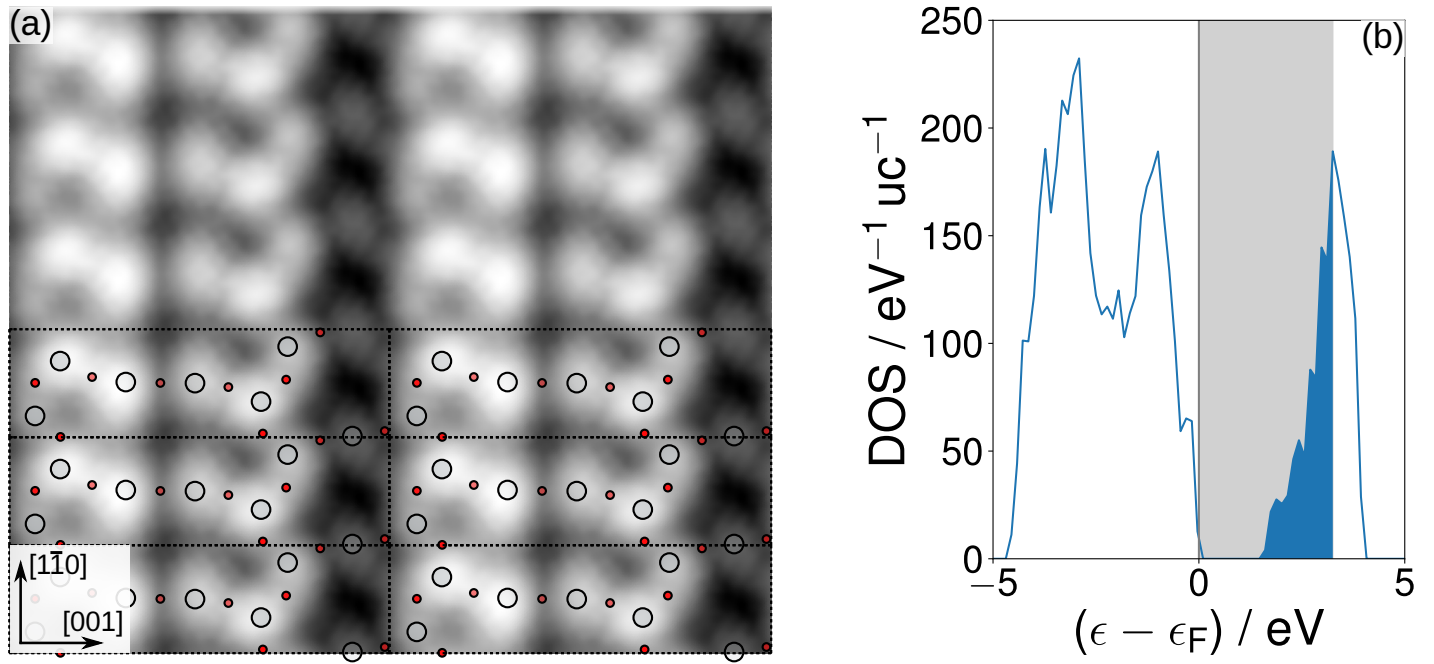

Fig. 2 (a) Simulated STM image (Tersoff-Hamann approximation<sup>2</sup> integrating the local density of states up to 3.3 eV above the Fermi level  $\epsilon_F$ ) of structure  $5 \times 1(i)$  in Fig. 5 of the manuscript. (b) Electronic density of states calculated using VASP<sup>3</sup> for the same structure.

## References

- 1 Z. Wang, H. Xianfeng, S. Gerhold, M. Schmid, C. Franchini and U. Diebold, *Phys. Rev. B*, 2014, **90**, 035436.
- 2 J. Tersoff and D. R. Hamann, *Phys. Rev. Lett.*, 1983, **50**, 1998–2001.
- 3 G. Kresse and J. Furthmüller, *Phys. Rev. B*, 1996, **54**, 11169–11186.
